# Supplementary material for: Puntualizaciones sobre la expresión allí donde existan (art. 149.1.8 de la Constitución)
Source: Royal Society of Chemistry journal article supplement (doi:10.1039/c5cp05691h), 2012-01-01
Supplement: c5cp05691h1.pdf [file c5cp05691h1.pdf]

### Supporting information:

In case of the plasma deposited  $\text{CoO}_x/\text{Ti}$  XRD patterns were recorded for  $\text{pl\_CoO}_x/\text{Ti\_4}$  and  $\text{pl\_CoO}_x\text{OH}_2/\text{Ti\_7}$ . A successful deposition of  $\text{CoO}_x$  was confirmed additional with XPS spectra for the here shown samples. All XRD measurements were recorded symmetric and additionally with an incidence angle of  $3^\circ$  for a higher surface sensitivity. Figure S1 shows the comparison of the recorded GIXRD and XRD for  $\text{pl\_CoO}_x\text{OH}_2/\text{Ti\_7}$ . As expected the intensity for the  $\text{TiO}_2$  reflexes is increased compared to the reflexes of Ti in case of the GIXRD but there are no reflexes for either  $\text{Co}_3\text{O}_4$  nor  $\text{CoO}$  or  $\text{Co}(\text{OH})_2$  detected. These results confirm that the plasma deposited  $\text{CoO}_x/\text{Ti}$  and  $\text{CoO}_x\text{OH}_2$  are X-ray amorphous.

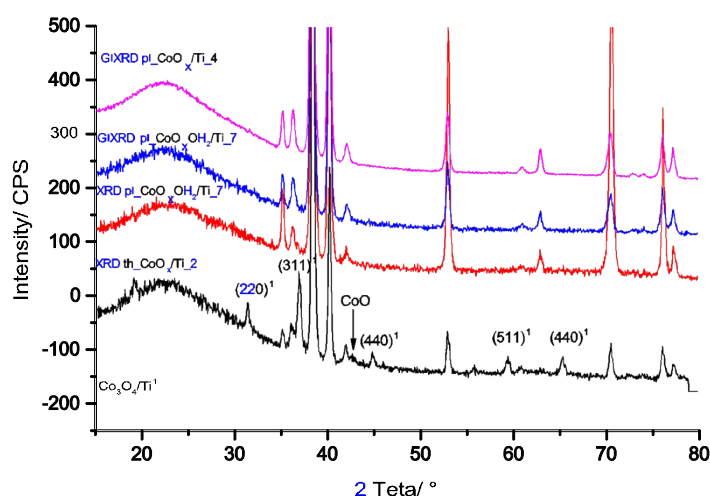

Figure S1. GIXRD pattern of  $\text{pl\_CoO}_x/\text{Ti\_4}$  (pink), as well as GIXRD of  $\text{pl\_CoO}_x\text{OH}_2/\text{Ti\_7}$  (blue) in comparison to the XRD pattern (red) and XRD of a conditioned  $\text{th\_CoO}_x/\text{Ti\_2}$  (black). GIXRD patterns were recorded using an incident angle of  $3^\circ$ .

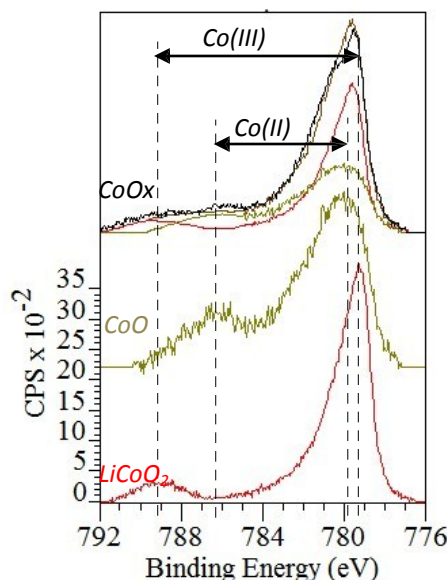

Figure S2. XPS spectra of  $\text{LiCo}_2$  and  $\text{CoO}$  used as line curve fit for the  $\text{Co 2p}$  spectra of  $\text{Co(II)Co(III)O}_x$ .

**Table S3. Electron Binding Energies for several peak fits of the Co 2p<sub>3/2</sub> line of the as deposited and the conditioned samples th\_CoO<sub>x</sub>/Ti.**

| Sample                    | Conditioning [min] | Fit I [eV] | Fit II [eV] | Co(III) [%] | VB [eV] | Φ [eV] | η at 2 mA/cm <sup>2</sup> [V] | η at 5 mA/cm <sup>2</sup> [V] |
|---------------------------|--------------------|------------|-------------|-------------|---------|--------|-------------------------------|-------------------------------|
| th_CoO <sub>x</sub> /Ti_2 | 0                  | 0          | 780         | 0           | 0.58    | 4.63   | 0.51                          | 0.55                          |
|                           | 2                  | 779.5      | 780.4       | 52          | 0.47    | 5.41   | 0.39                          | 0.43                          |
|                           | 12                 | 779.4      | 780.5       | 62          | 0.36    | 5.44   | 0.39                          | 0.42                          |
|                           | 27                 | 779.6      | 780.2       | 77          | 0.34    | 4.85   | 0.38                          | 0.43                          |
| th_CoO <sub>x</sub> /Ti_1 | 0                  | 779.5      | 780.6       | 10          | 0.53    | 4.55   | 0.5                           | X                             |
|                           | 2                  | 779.5      | 780.4       | 52          | 0.57    | 5.17   | 0.45                          | 0.48                          |
|                           | 12                 | 779.4      | 780.5       | 71          | 0.52    | 5.22   | 0.45                          | 0.48                          |

**Table S4. Electron Binding Energies for several peak fits of the Co 2p line of the as deposited and the conditioned samples plasma deposited samples.**

| Sample                                    | Conditioning [min] | Fit I [eV] | Fit II [eV] | Co(III) [%] | VB [eV] | Φ [eV] | η (2 mA/cm <sup>2</sup> ) [V] | η (5 mA/cm <sup>2</sup> ) [V] | η (10 mA/cm <sup>2</sup> ) [V] |
|-------------------------------------------|--------------------|------------|-------------|-------------|---------|--------|-------------------------------|-------------------------------|--------------------------------|
| pl_CoO <sub>x</sub> /Ti_3                 | 0                  | 779.5      | 780.8       | 60          | 0.49    | 4.67   | 0.43                          | 0.45                          | 0,47                           |
|                                           | 15                 | 779.8      | 781.0       | 55          | 0.35    | 4.73   | 0.43                          |                               |                                |
| pl_CoO <sub>x</sub> /Ti_9                 | 0                  | 779.6      | 780.1       | 62          | 0.42    | 4,73   | 0.39                          | 0.45                          | n.d                            |
|                                           | 15                 | 779.5      | 780.1       | 77          | 0.34    | 4.88   | 0.45                          |                               |                                |
| pl_CoO <sub>x</sub> OH <sub>2</sub> /Ti_6 | 0                  | 779.3      | 780.8       | 37          | 0.43    | 4.58   | 0.37                          | 0.4                           | 0,41                           |
|                                           | 15                 | 780.2      | 780.5       | 90          | 0.38    | 4.0    | 0.37                          |                               |                                |
| pl_CoO <sub>x</sub> OH <sub>2</sub> /Ti_8 | 0                  | x          | 780.5       | 0           | 0.21    | 3.9    | 0.33                          | 0.34                          | 0,37                           |
|                                           | 5                  | 779.6      | 780         | 90          | 0.35    | 5.5    | 0.33                          |                               |                                |
